# Supplementary material for: Synthesis and characterization of naphthalenediimide-thienothiophene-conjugated polymers for OFET and OPT applications
Source: Royal Society of Chemistry journal article supplement (doi:10.1039/d3tc02109b), 2023-01-01
Supplement: d3tc02109b1.pdf [file d3tc02109b1.pdf]

## SUPPORTING INFORMATION

# Synthesis and Characterization of Naphthalenediimide Thienothiophene Conjugated Polymers for OFET and OPT Applications

Dilara Gunturkun <sup>a</sup>, Recep Isci <sup>a</sup>, Sheida Faraji <sup>a, b</sup>, Berkay Sütay <sup>a</sup>, Leszek A. Majewski<sup>b</sup>, Turan Ozturk <sup>a, c, \*</sup>

<sup>a</sup> Istanbul Technical University, Department of Chemistry, 34469 Istanbul, Turkey.

<sup>b</sup> Department of Electrical and Electronic Engineering, University of Manchester, Sackville Street, Manchester M13 9PL, UK.

<sup>c</sup> TUBITAK UME, Chemistry Group Laboratories, Gebze, Kocaeli 54, 41470, Turkey.

### Contents

|                                                |   |
|------------------------------------------------|---|
| 1. Optic Properties.....                       | 2 |
| 2. Thermal Properties.....                     | 2 |
| 3. Computational Chemistry.....                | 3 |
| 4. Organic Phototransistor Devices.....        | 4 |
| 5. Gel Permeation Chromatography Analysis..... | 4 |
| 6. NMR Spectra .....                           | 5 |

## 1. Optic Properties

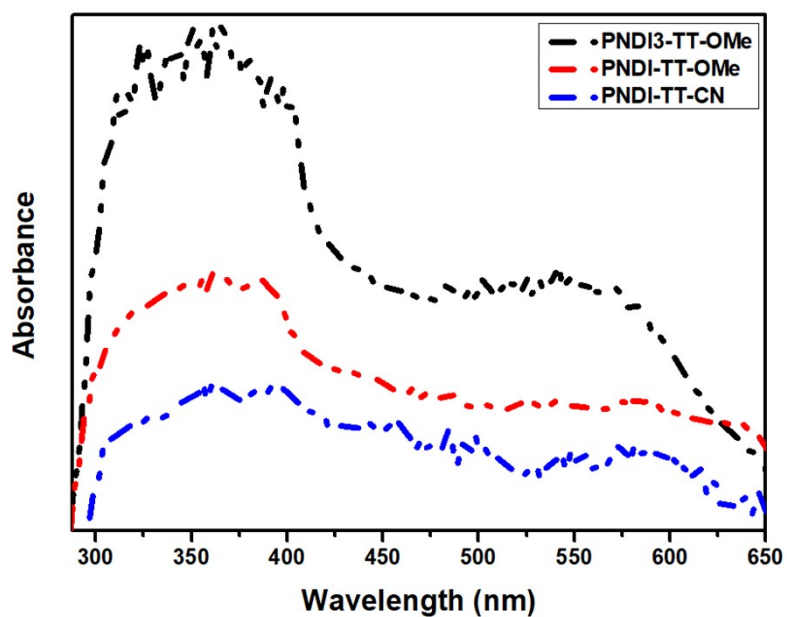

Fig. S1 UV-Vis absorption spectrum of the polymers on ITO.

## 2. Thermal Properties

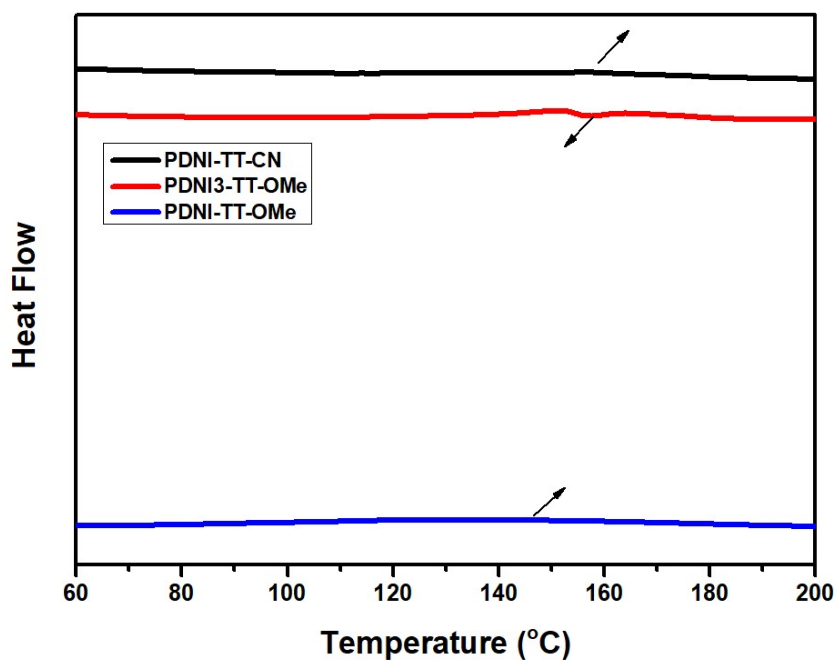

Fig. S2 DSC curves of the polymers.

### 3. Computational Chemistry

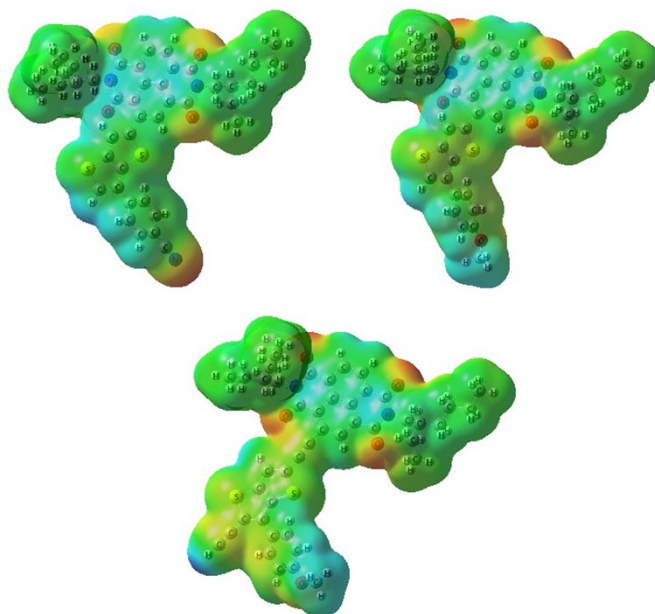

**Fig. S3** Molecular electrostatic potential maps of **PNDI-TT-CN** (top-left), **PNDI-TT-OMe** (top-right) and **PNDI3-TT-OMe** (bottom) molecules.

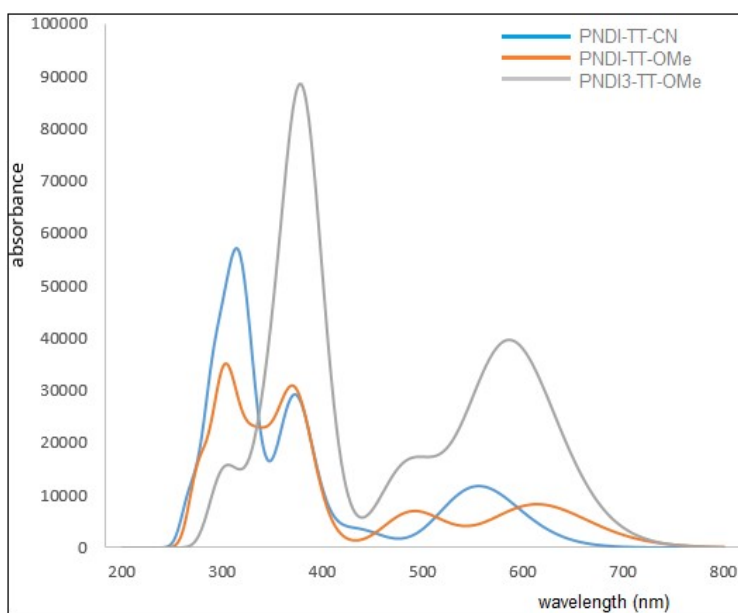

**Fig. S4** Theoretical UV-VIS spectra of the studied molecules (*in THF*).

## 4. Organic Phototransistor Devices

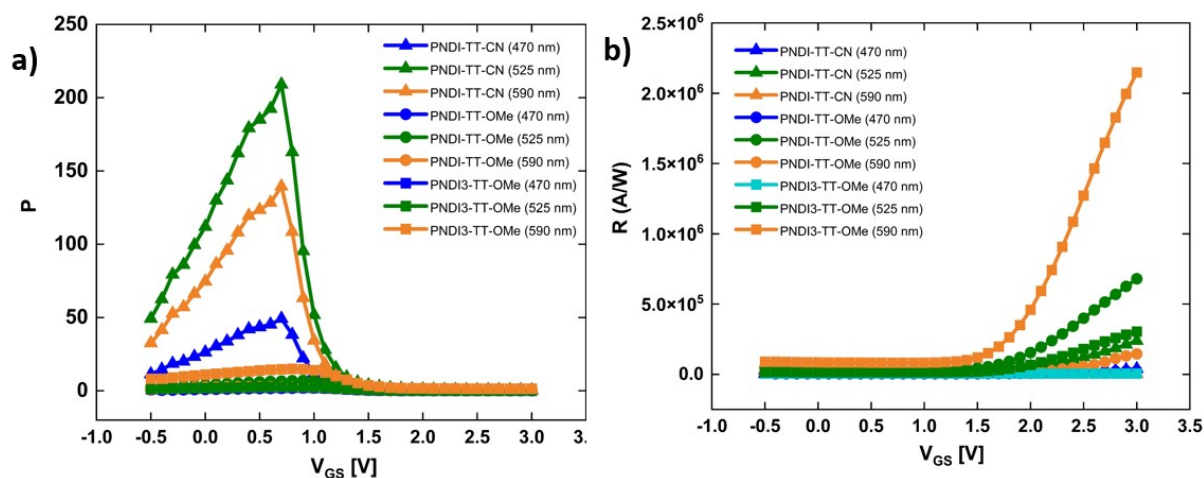

**Fig. S5** Comparative plots of (a) photosensitivity and (b) photoresponsivity of the polymers OPTs under illumination to different light wavelengths.

## 5. Gel Permeation Chromatography Analysis

### Result of molecular weight calculation (RI)

Peak 1 Base Peak

|               | [min] | [mV]    | [mol]       |         |        |
|---------------|-------|---------|-------------|---------|--------|
| Peak start    | 7.107 | -26.907 | 75,039      | Mn      | 9,205  |
| Peak top      | 8.435 | -11.932 | 5,219       | Mw      | 18,088 |
| Peak end      | 8.605 | -13.608 | 3,676       | Mz      | 33,454 |
|               |       |         |             | Mz+1    | 44,105 |
| Height [mV]   |       |         | 3.185       | Mv      | 18,088 |
| Area [mV*sec] |       |         | 110.272     | Mp      | 5,220  |
| Height% [%]   |       |         | 55.608      | Mz/Mw   | 1.850  |
| [eta]         |       |         | 18087.81145 | Mw/Mn   | 1.965  |
|               |       |         |             | Mz+1/Mw | 2.438  |

**Fig. S6** GPC result of PNDI-TT-CN.

### Result of molecular weight calculation (RI)

Peak 1 Base Peak

|               | [min] | [mV]   | [mol]       |         |        |
|---------------|-------|--------|-------------|---------|--------|
| Peak start    | 7.293 | -0.995 | 52,044      | Mn      | 8,040  |
| Peak top      | 7.852 | 0.329  | 17,114      | Mw      | 17,182 |
| Peak end      | 9.073 | 6.593  | 1,387       | Mz      | 23,827 |
|               |       |        |             | Mz+1    | 28,407 |
| Height [mV]   |       |        | 1.056       | Mv      | 17,182 |
| Area [mV*sec] |       |        | 47.230      | Mp      | 18,058 |
| Height% [%]   |       |        | 9.897       | Mz/Mw   | 1.387  |
| [eta]         |       |        | 17181.59308 | Mw/Mn   | 2.137  |
|               |       |        |             | Mz+1/Mw | 1.653  |

**Fig. S7** GPC result of PNDI-TT-OMe.

## Result of molecular weight calculation (RI)

Peak 1 Base Peak

|               | [min] | [mV]   | [mol]       |         |        |
|---------------|-------|--------|-------------|---------|--------|
| Peak start    | 7.238 | -1.085 | 57,988      | Mn      | 13,798 |
| Peak top      | 7.828 | 4.710  | 17,937      | Mw      | 21,175 |
| Peak end      | 8.523 | 16.679 | 4,351       | Mz      | 28,441 |
|               |       |        |             | Mz+1    | 33,951 |
|               |       |        |             | Mv      | 21,175 |
| Height [mV]   |       |        | 2.361       | Mp      | 17,938 |
| Area [mV*sec] |       |        | 118.359     | Mz/Mw   | 1.343  |
| Height% [%]   |       |        | 21.222      | Mw/Mn   | 1.535  |
| [eta]         |       |        | 21175.35435 | Mz+1/Mw | 1.603  |

**Fig. S8** GPC result of PNDI3-TT-OMe

## 6. NMR Spectra

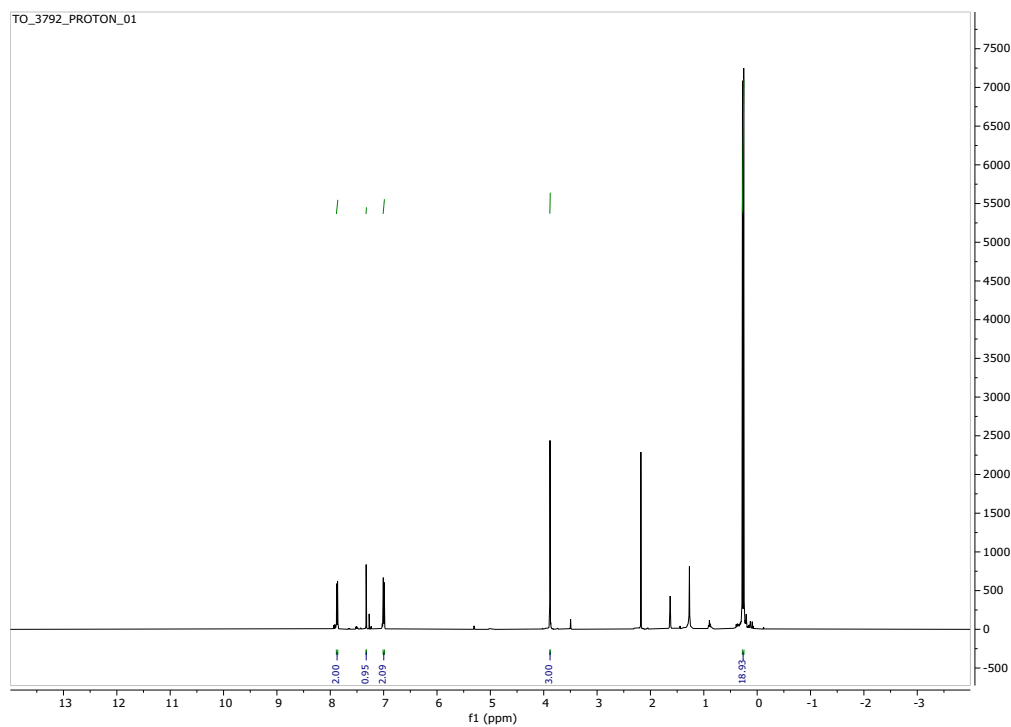

**Fig. S9** <sup>1</sup>H-NMR spectrum of compound 11.

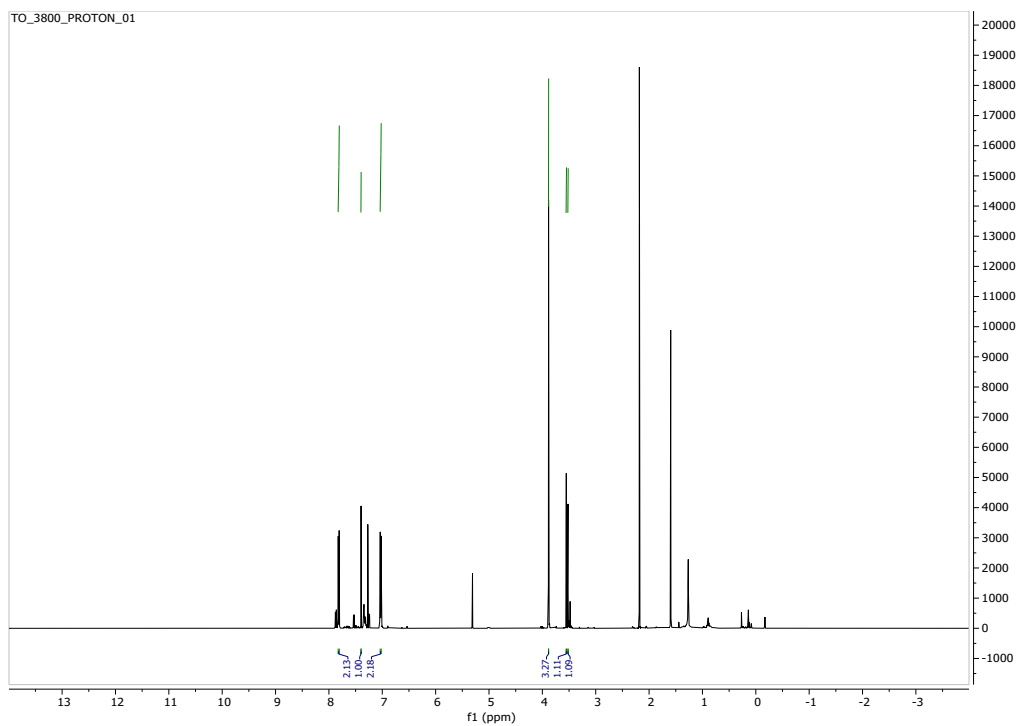

**Fig. S10** <sup>1</sup>H-NMR spectrum of compound 12.

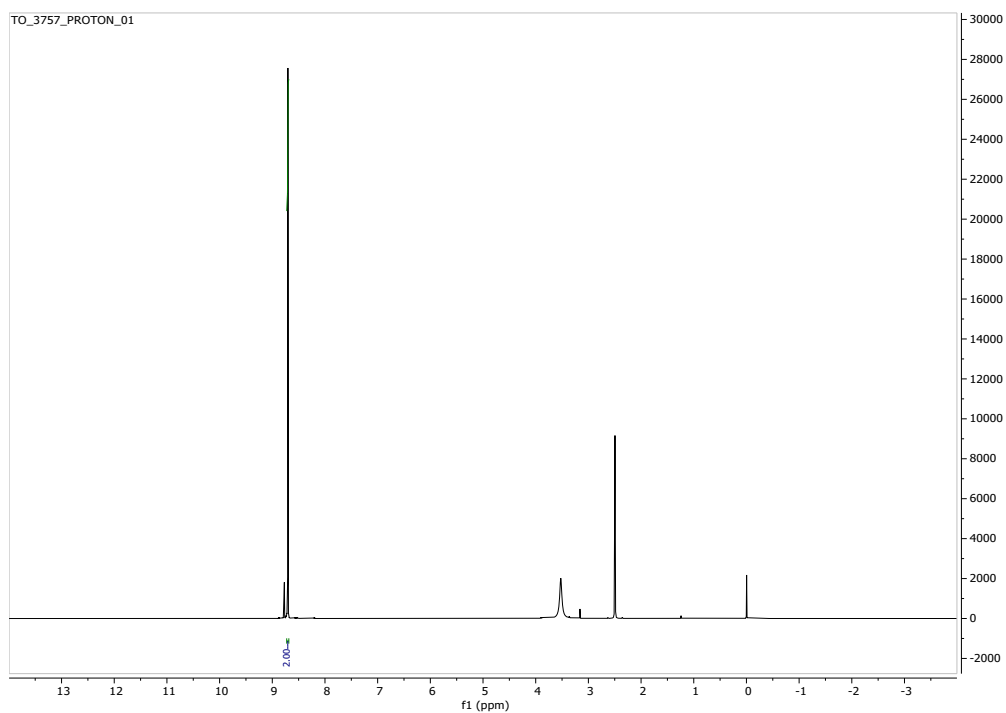

**Fig. S11** <sup>1</sup>H-NMR spectrum of compound 14.

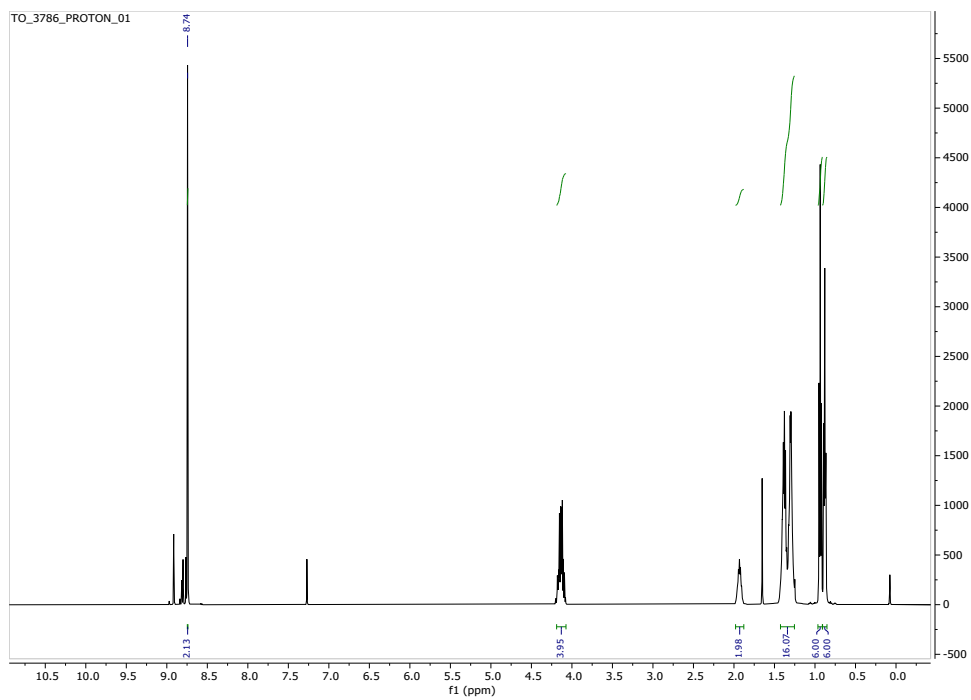

**Fig. S12**  $^1\text{H-NMR}$  spectrum of compound **15**.
